# Supplementary material for: Salmonella Typhimurium and Pseudomonas aeruginosa Respond Differently to the Fe Chelator Deferiprone and to Some Novel Deferiprone Derivatives
Source: MDPI journal article supplement (doi:10.3390/ijms221910217), 2021-09-23
Supplement: s1 [file s1]

Supplementary Materials

Table S1. Bacterial strains

| Name                                        | Relevant genotype                                           | Source or Ref  |
|---------------------------------------------|-------------------------------------------------------------|----------------|
| <i>Salmonella enterica</i> ser. Typhimurium |                                                             |                |
| ATCC® 14028™                                | wild type                                                   | Lab collection |
| SA330                                       | <i>fepA/entF::kan</i>                                       | [25]           |
| SA213                                       | <i>iroB</i> -3Xflag (kan) <i>ilvI::Tn10dTac-cat::3Xflag</i> | [26]           |
| MC120                                       | <i>sodB</i> -3Xflag (kan)                                   | [25]           |
| <i>Pseudomonas aeruginosa</i>               |                                                             |                |
| PAO1                                        | wild type                                                   | Lab collection |
| <i>pchDpvdA</i>                             | <i>pchD pvdA</i>                                            | [15]           |
| <i>Escherichia coli</i>                     |                                                             |                |
| DH5α                                        | Prom- <i>pchR</i> pMP220                                    | Lab collection |
| DH5α                                        | Prom- <i>pvdS</i> pMP220                                    | Lab collection |
| DH5α                                        | Prom- <i>feoA</i> pMP220                                    | Lab collection |
| HB101                                       | pRK2013                                                     | Lab collection |

**Table S2. Structures of DFP - derivative compounds**

| Name | Structure |
|------|-----------|
| 1    |           |
| 2a   |           |
| 2b   |           |
| 3a   |           |
| 3b   |           |
| 4a   |           |
| 4b   |           |
| 5a   |           |

5b

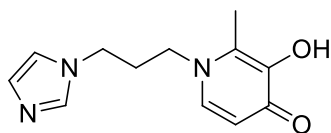

6a

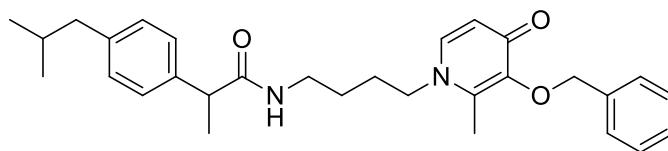

6b

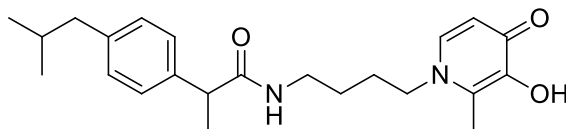

7a

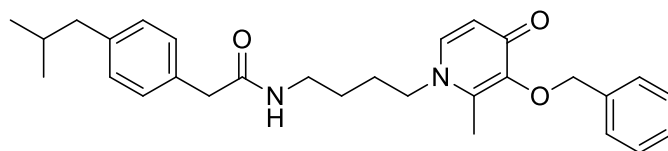

7b

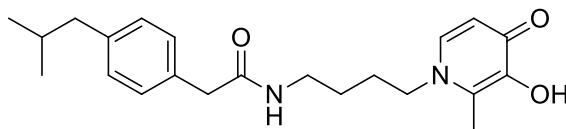

8a

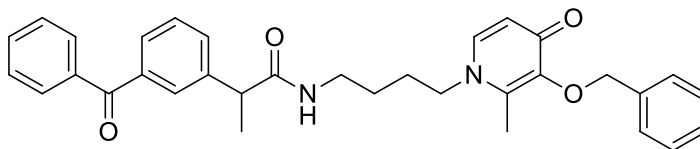

8b

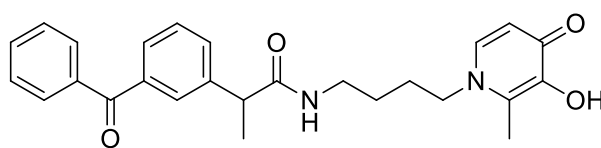

|                 | $A_{407/600}$       |
|-----------------|---------------------|
| PAO1            | $0.0030 \pm 0.0003$ |
| PAO1 + DFP 1 mM | $0.0385 \pm 0.0032$ |

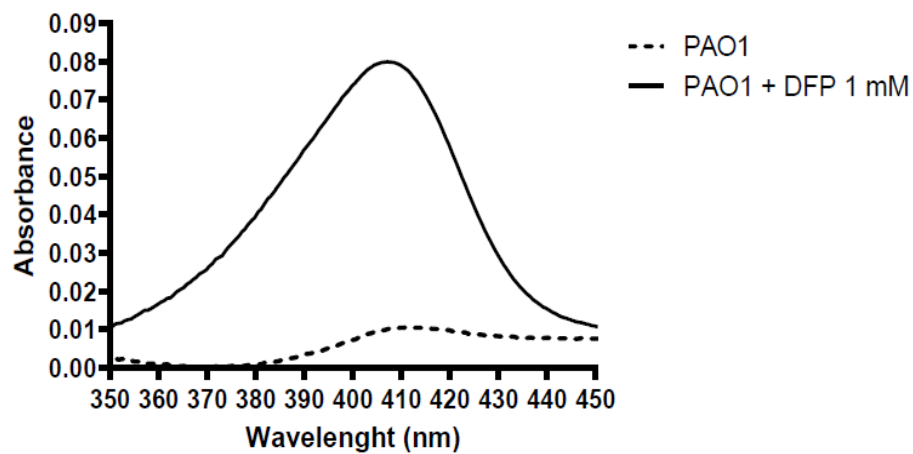

**Figure S1: DFP induces pyoverdine production in *P. aeruginosa* cultivated in LB.** PAO1 Was grown for 24 h at 37°C in LB in the absence of DFP or in presence of 1 mM DFP. Bacteria were harvested by centrifugation and the supernatant was analyzed to detect the presence of pyoverdine. Both the  $A_{407}/A_{600}$  ratio and the spectra of the supernatants indicate the accumulation of a species with and absorption peak centered close to 407 nm (pyoverdine) in bacteria grown in presence of DFP.



A

# STM

Hoechst

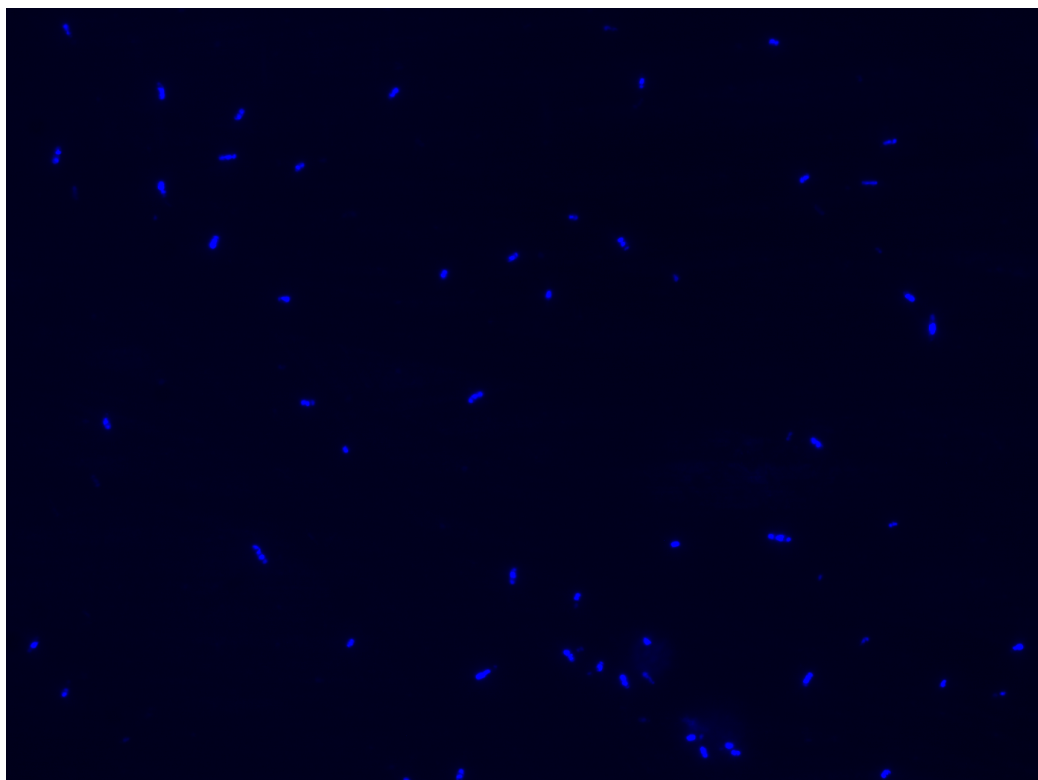

compound 1

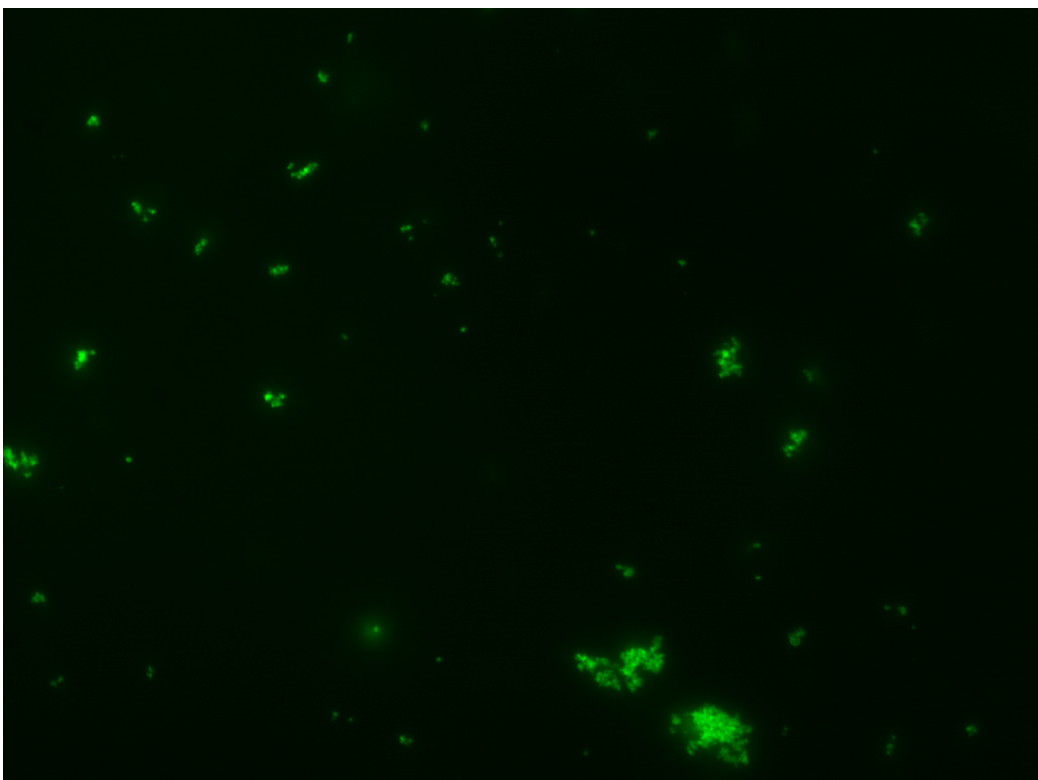

merge

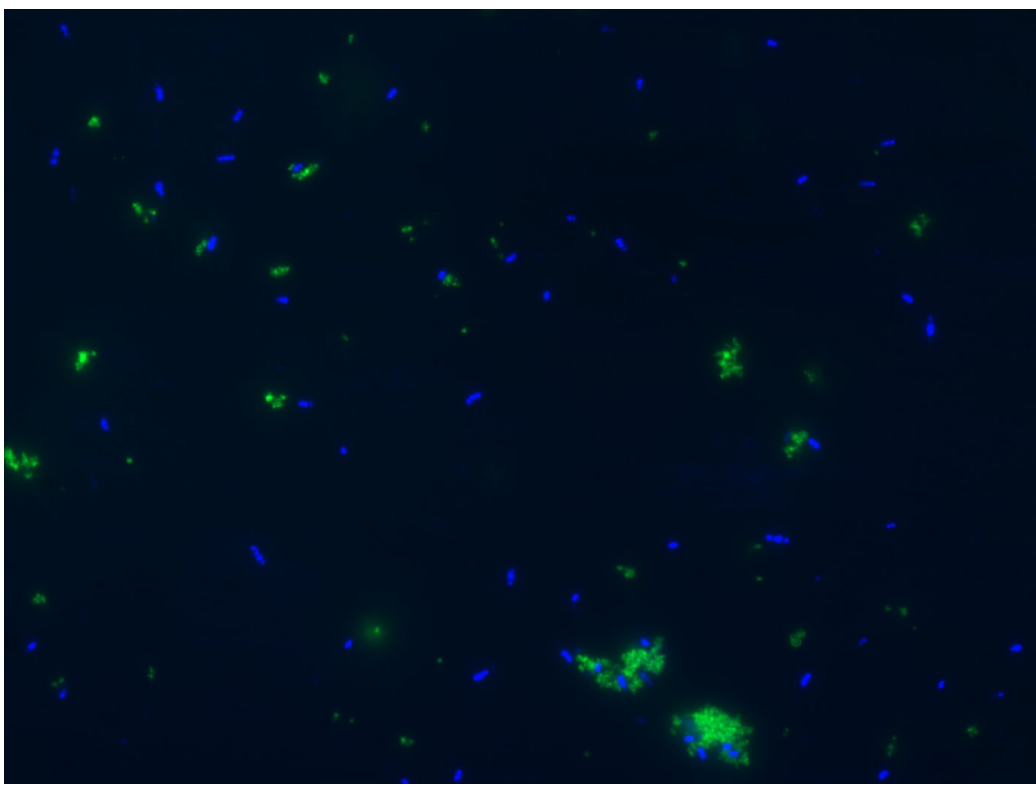

**B**

**PAO1**

Hoechst

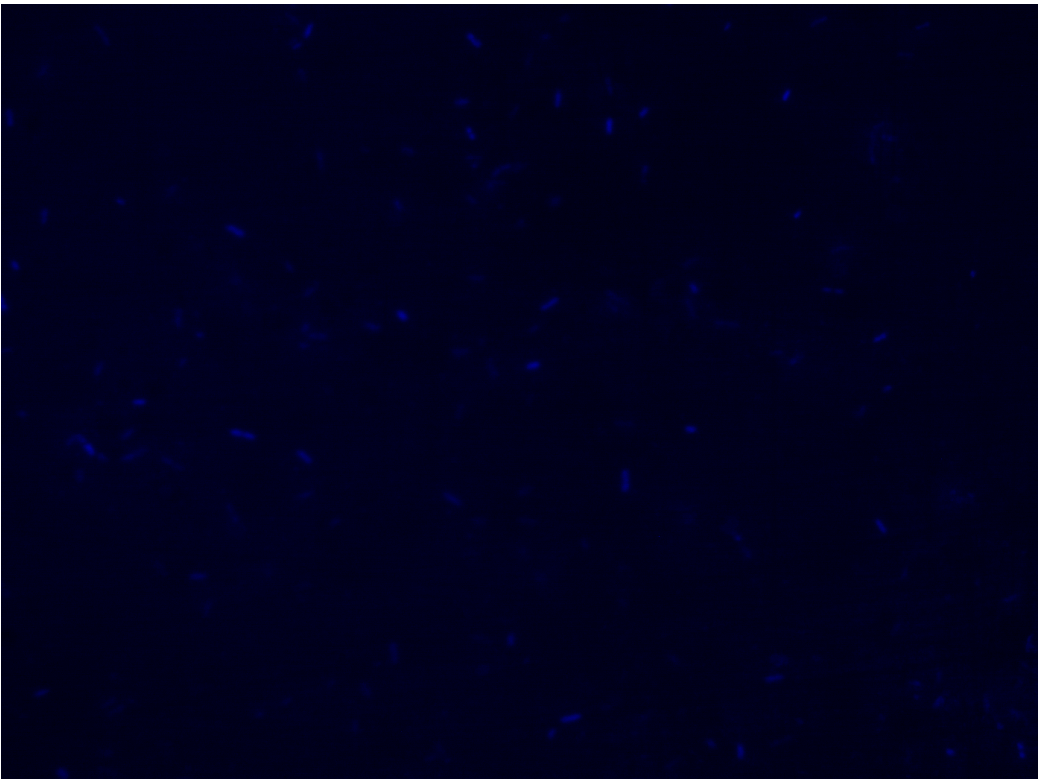

compound 1

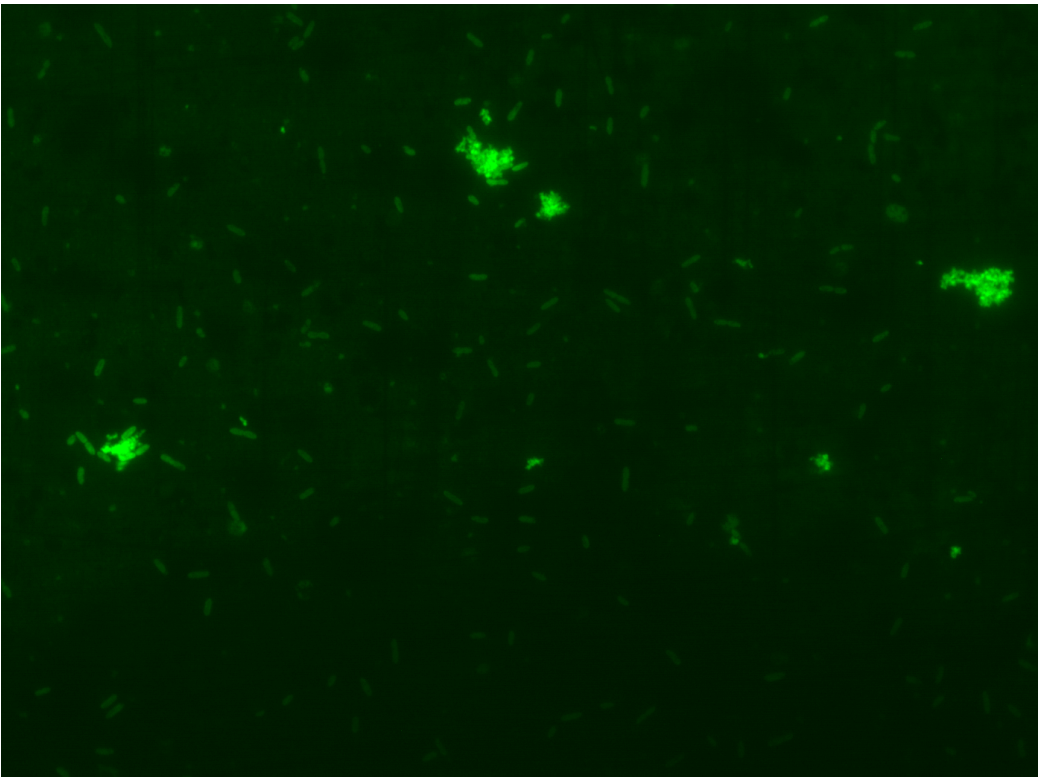

merge

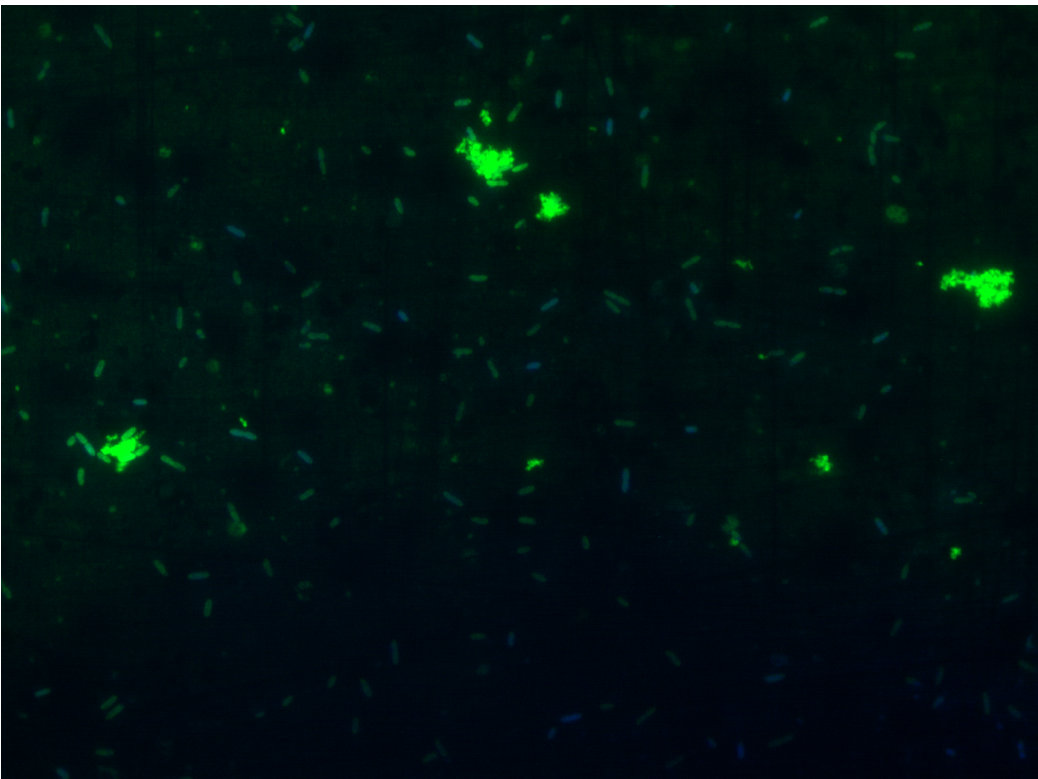



c

STM

Hoechst

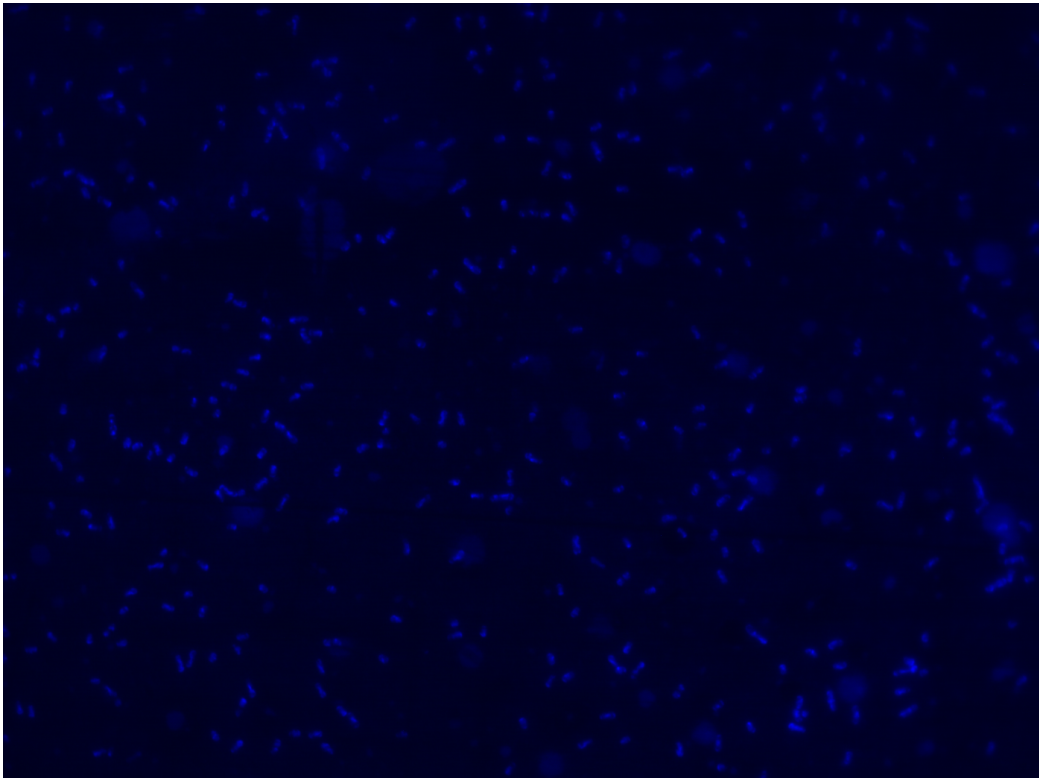

fluo probe

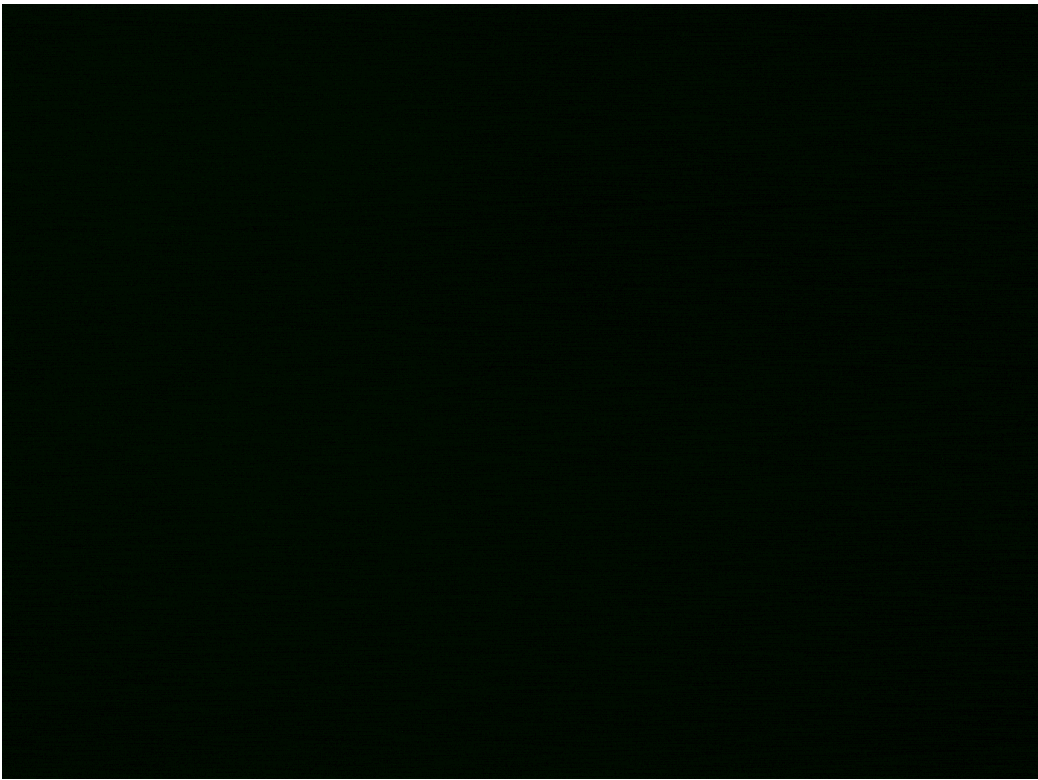

merge

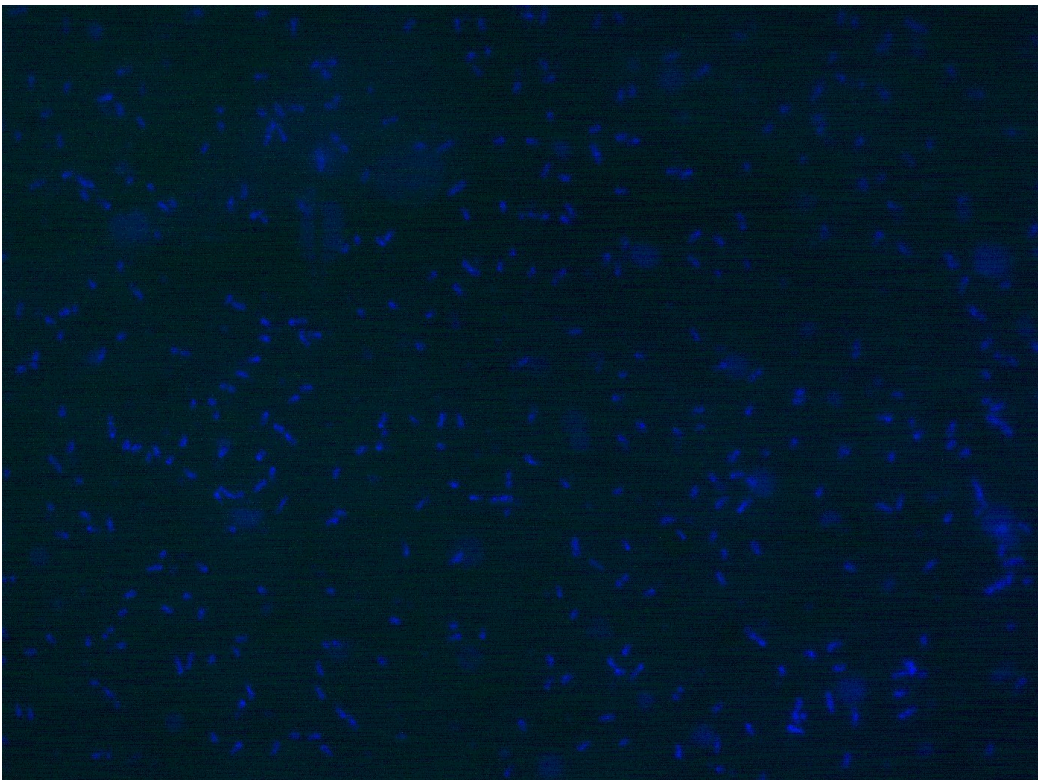



D

PAO1

Hoechst

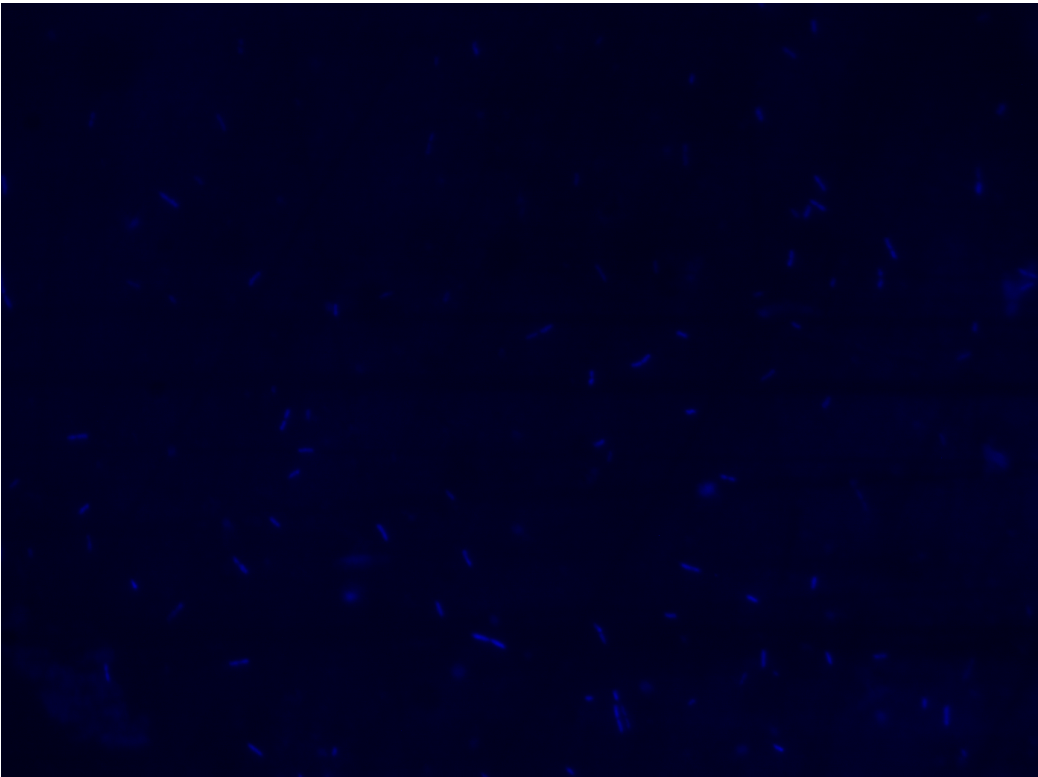

fluo probe

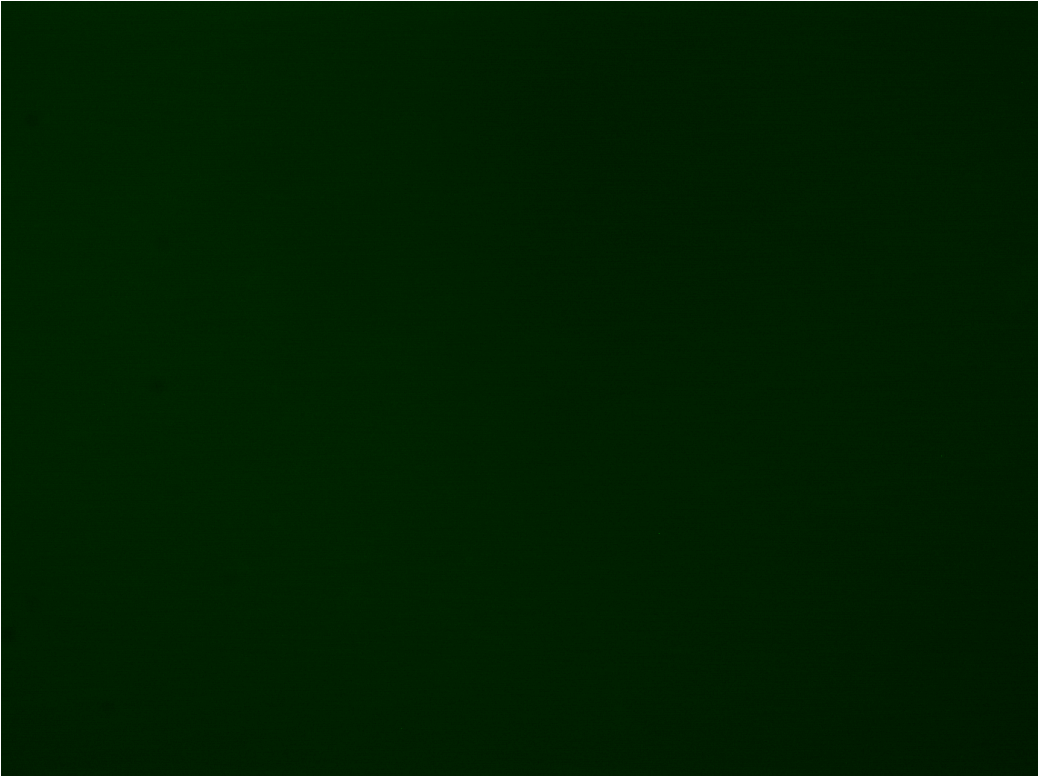

merge

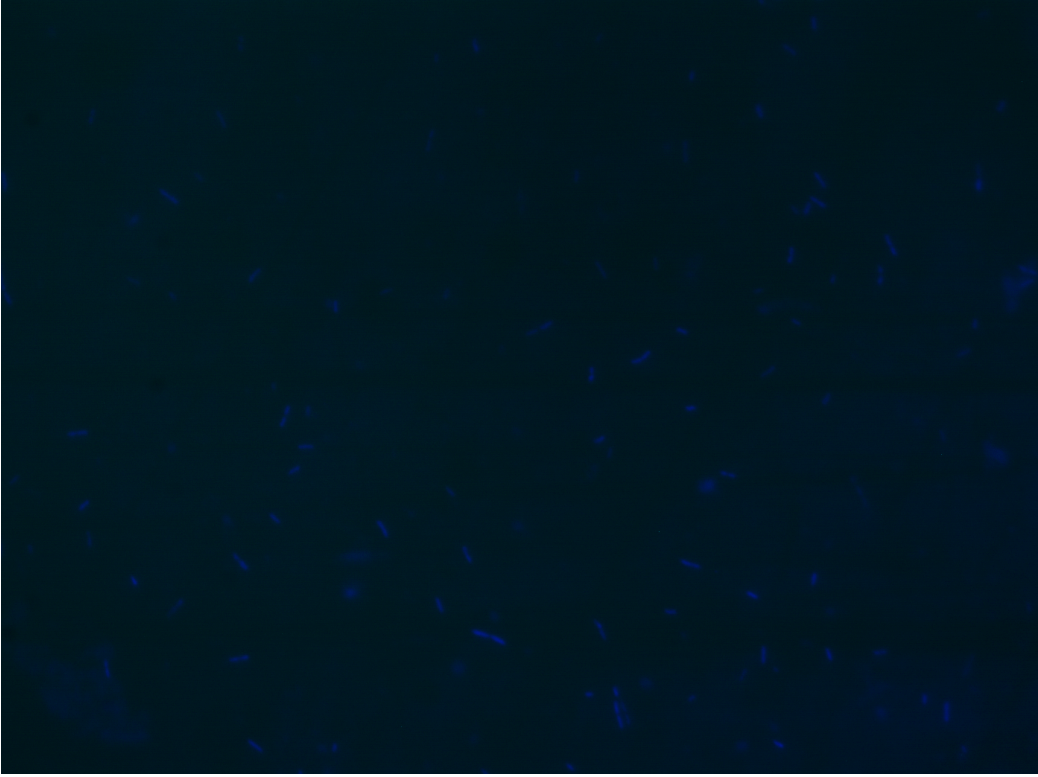

**E**

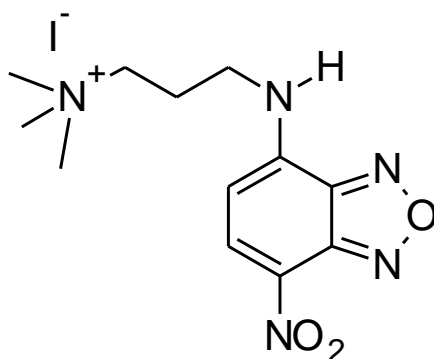

**Supplementary Figure S2.** Full images of fluorescence microscopy of STM and PAO1 cells after treatment with compound **1** (**panels A and B**) or with the fluorescent probe not conjugated to DFP (**panels C and D**). As shown in the merge panels, the fluorescent signal from compound **1** does not overlap with any of the STM cells while it merges with PAO1 cells, showing a kind of peripheral distribution in some of them. No signal was detected after incubation of both STM and PAO1 with the fluorescent probe (fluo probe) that lacks the DFP moiety, indicating that the interaction of compound **1** with PAO1 cells is due to DFP. **Panel E:** molecular structure of the fluorescent probe.
